# Genetic variation and phenotypic plasticity in circadian rhythms in an armed beetle, *Gnatocerus cornutus* (Tenebrionidae)

KENTAROU MATSUMURA<sup>1</sup>, MASATO S. ABE<sup>2</sup>, MANMOHAN D. SHARMA<sup>3</sup>,  
DAVID J. HOSKEN<sup>3</sup>, TAISHI YOSHII<sup>4</sup> and TAKAHISA MIYATAKE<sup>1\*</sup>✉

<sup>1</sup>Graduate School of Environmental and Life Science, Okayama University, Okayama, Japan

<sup>2</sup>Center for Advanced Intelligence Project, RIKEN, Tokyo, Japan

<sup>3</sup>Centre for Ecology and Conservation, School of Biosciences, University of Exeter, Tremough, Penryn, UK

<sup>4</sup>Graduate School of Natural Science and Technology, Okayama University, Okayama, Japan

Received 8 January 2020; accepted for publication 30 January 2020

Circadian rhythms, their free-running periods and the power of the rhythms are often used as indicators of biological clocks, and there is evidence that the free-running periods of circadian rhythms are not affected by environmental factors, such as temperature. However, there are few studies of environmental effects on the power of the rhythms, and it is not clear whether temperature compensation is universal. Additionally, genetic variation and phenotypic plasticity in biological clocks are important for understanding the evolution of biological rhythms, but genetic and plastic effects are rarely investigated. Here, we used 18 isofemale lines (genotypes) of *Gnatocerus cornutus* to assess rhythms of locomotor activity, while also testing for temperature effects. We found that total activity and the power of the circadian rhythm were affected by interactions between sex and genotype or between sex, genotype and temperature. The males tended to be more active and showed greater increases in activity, but this effect varied across both genotypes and temperatures. The period of activity varied only by genotype and was thus independent of temperature. The complicated genotype–sex–environment interactions we recorded stress the importance of investigating circadian activity in more integrated ways.

**ADDITIONAL KEYWORDS:** circadian rhythm – *Gnatocerus cornutus* – isofemale line – power of circadian rhythm.

## INTRODUCTION

Many species show a rhythmicity of activity, from the timing of flowering in plants to foraging behaviour in animals (Saunders, 2002). Examination of these rhythms in sexually dimorphic animals is interesting because males and females could have different life-history strategies and thus different daily patterns of activity (e.g. Anderson, 1994; Emlen, 2015). A rhythmicity approaching 24 h is called a circadian rhythm, and many studies have identified the genes underpinning circadian rhythms (Dunlap, 1996). Additionally, the time it takes for an organism to repeat endogenous rhythms in the absence of environmental cues is known as the free-running period and, amongst

other things, this provides information on the accuracy of internal clocks (Klarsfeld *et al.*, 2003). The power of the circadian rhythm (i.e. the strength of the rhythm; hereafter, ‘power’) is another measure of activity cycles and indicates the inherent strength of the rhythm (Klarsfeld *et al.*, 2003). Although many previous studies have explored free-running periods, few have investigated the power of the circadian rhythm (but see Cavey *et al.*, 2016; Fujioka *et al.*, 2017; King *et al.*, 2017).

Free-running periods of circadian rhythms can vary with the light intensity (Aschoff, 1960, 1965), but rhythms can remain robust over a wide range of temperatures, a situation known as temperature compensation (e.g. Pittendrigh, 1954; Zimmerman *et al.*, 1968; Dunlap *et al.*, 2004). Be that as it may, there are a few published reports of temperature compensation in the power of circadian rhythms (e.g. Sorek & Levy, 2012).

\*Corresponding author. E-mail: [miyatake@okayama-u.ac.jp](mailto:miyatake@okayama-u.ac.jp)

In addition to environmental effects, circadian rhythms can also differ between the sexes. For example, in the fly *Drosophila melanogaster*, the free-running period of males is shorter than that of females (Helfrich-Förster, 2000). This suggests that males have different periods of rhythm, possibly to facilitate searching for females (Helfrich-Förster, 2000). It is also possible that the power is different between males and females. To date, however, no investigation of the effect of sex on power has been reported, although in species with strong sexual selection (e.g. those with pronounced dimorphism in sexually selected morphology) there might well be dimorphism in the strength and period of biorhythms as a result of sex-specific selection.

Here, we investigated the effects of temperature on the free-running period, power and circadian rhythm of locomotor activity in the broad-horned flour beetle, *Gnatocerus cornutus* (Fabricius, 1798), while also testing for sex-specific effects. In *G. cornutus*, only males develop mandibles, and they often fight with rival males to obtain matings using these condition-dependent weapons (Okada *et al.*, 2006; House *et al.*, 2016). Furthermore, there is significant genetic variation in mandible size, and this affects fighting and mating outcomes (Harano *et al.*, 2010). Thus, this species is ideal to assess whether strong sexual selection has resulted in sex differences in activity rhythms, power and periods, because beetles generally show evidence of circadian activity (Harano & Miyatake, 2011). In our investigation, we used 18 iso-female lines (genotypes), making it possible also to test for genetic variation in circadian rhythms of locomotor activity, their free-running period and power. We also investigated the plasticity of the activity rhythm by measuring it at different temperatures.

## MATERIAL AND METHODS

### STOCK POPULATION AND ISOLINES

The *G. cornutus* beetle culture originated from adults collected in Miyazaki City (31°54'N, 131°25'E), Japan, in 1957 (see Okada *et al.*, 2006), and has been maintained in the laboratory of the National Food Research Institute and Okayama University for ~50 years on whole meal enriched with yeast as food. Beetles were reared on whole meal enriched with brewer's yeast and kept at 25–27 °C and 60% relative humidity under a photoperiod of 14 h light–10 h dark (House *et al.*, 2016). We established 18 iso-female lines (isolines, i.e. standardized genotypes) from the stock population. Initially, 18 males and 18 females were selected at random and paired. Subsequent full-sib matings within each family were used to propagate

each line for 37 generations until the present study was conducted. Differences between lines are then largely genetic, and any within-line variance is largely environmental (David *et al.*, 2005). Lines can effectively be thought of as different genotypes (David *et al.*, 2005). To obtain adults for the present experiments, one final instar larva was placed in a separate well of a 24-well tissue culture plate, because pupation in *G. cornutus* is inhibited at a high larval density (Okada *et al.*, 2006).

### LOCOMOTOR ACTIVITY

To assess circadian rhythm, we maintained beetles in 14 h light–10 h dark conditions for > 20 days in an incubator kept at 25 °C before the measurement of locomotor activity, and we then measured the locomotor activity of *G. cornutus* for 10 days in darkness. A beetle from each isoline with enough food, as described above, was put in a clear plastic Petri dish (30 mm × 10 mm) in an incubator maintained at 25 or 29 °C. The beetles develop faster at 29 °C (unpublished observation, T.M.), and most investigation of the behaviour of this beetle has been conducted under 25 °C (Okada *et al.*, 2006; Okada & Miyatake, 2009, 2010); therefore, we chose these two temperatures, 25 and 29 °C, for this experiment. The locomotor activity of each individual was monitored using an infrared actograph. An infrared light beam was passed through a clear Petri dish, and the beam was projected onto a photomicrosensor (E3S-AT11; Omron, Kyoto, Japan) that detected all interruptions of the light beam. Signals of interruption of the infrared light beam were recorded every 6 min. The sample size of each isoline is shown in the Supporting Information (Table S1).

### STATISTICAL ANALYSIS

To determine the circadian rhythm, the locomotor activity data for 10 days (i.e. total activity) in the constant dark conditions was analysed. The free-running period of circadian rhythm was established using a  $\chi^2$  periodogram test (Sokolove & Bushell, 1978) for data on locomotor activity between 20 and 28 h (Halberg, 1969). Circadian rhythmicity was determined using  $\chi^2$  periodogram analysis, and we used 'power' as an index for the strength of the rhythms. The power of the circadian rhythm was defined as the maximal difference between the  $\chi^2$  value and the significance threshold line  $P = 0.05$ , i.e. the size of the peak above 5% threshold (see Klarsfeld *et al.*, 2003; fig. 1). The power is high when the rhythm is clear and strong, and a power of less than zero indicates a statistically arrhythmic state.

To analyse the effects of temperature, isoline and sex on the period and power of the circadian rhythm and on total activity, we used MANOVA and post-hoc ANOVA.

All statistics were based in R v.3.4.3 (R Development Core Team, 2017).

## RESULTS

The MANOVA revealed significant main effects for all predictors and interactions on the multivariate combination of power, period and total activity. All variables were significant (see [Supporting Information, Table S2](#)). Post-hoc tests showed that power and total activity were the main drivers of these effects, with all predictors and interactions being significant for power, whereas sex, temperature and isoline plus the sex-by-isoline interaction were significant for total activity ([Table 1](#)).

Strictly speaking, it is the highest-order interactions that need to be interpreted, which for power was the three-way interaction between sex, temperature and isoline, indicating that there is a genotype-by-environment effect that varies by sex affecting the power of the rhythm ([Fig. 1A](#); [Table 1](#); [Supporting Information, Fig. S1A](#)). Males showed higher power than females at 25 °C, and the difference between sexes disappeared at 29 °C ([Fig. 1A](#)).

The period of activity was significantly affected only by isoline with a weak trend for a temperature–isoline effect, and all other effects non-significant ([Fig. 1B](#); [Table 1](#); [Supporting Information, Fig. S1B](#)). Examples of activity rhythms of males and females at the two temperatures are shown in the [Supporting Information \(Fig. S3\)](#).

For total activity, there was a sex-by-isoline interaction, suggesting genetic variation in activity that varied between the sexes ([Fig. 1C](#); [Table 1](#); [Supporting Information, Fig. S1C](#)). Males exhibited higher activity than females at both temperatures ([Fig. 1C](#); [Table 1](#); [Supporting Information, Fig. S2](#)).

## DISCUSSION

In *G. cornutus*, only males fight with rival males to obtain matings using the developed mandibles ([Okada \*et al.\*, 2006](#)), which are condition dependent ([House \*et al.\*, 2016](#)), and the significant genetic variation in mandible size affects fighting and mating outcomes ([Harano \*et al.\*, 2010](#)). This could generate sexual differences in activity and circadian-related traits. Furthermore, a sexual difference in circadian characters might be especially prevalent across different environments because male sexual traits tend to be condition dependent; therefore, males may be susceptible to stressors such as elevated temperatures ([Rashed & Polak, 2010](#)). To test these ideas, we measured the locomotor activity of a number

of *G. cornutus* genotypes (isolines) at 25 and 29 °C, assessing the free-running period and power of the circadian rhythm, in addition to total activity, across genotype, sex and temperature environments. Our findings suggested that males tended to be more active and showed greater increases in activity than females in this species. However, we found complicated interactions in addition to main effects (temperature, sex and genotype) for the multivariate combinations of these activity measures. There were very strong univariate effects that also included interactions between some of our predictors. The exception was the period of the activity rhythm, which was affected only by genotype (isoline).

Many previous studies have suggested that the free-running period of activity rhythm should show temperature compensation and remain robust over a wide range of temperatures (e.g. [Pittendrigh, 1954](#); [Zimmerman \*et al.\*, 1968](#); [Dunlap \*et al.\*, 2004](#)), and this is what we found. Temperature had no impact on the activity rhythm period (the rhythm was temperature compensated), which was impacted only by genotype, suggesting that period can evolve in spite of temperature compensation and that the environmental impacts on it are buffered across the range of temperatures we tested. Additionally, there were no sex effects or interactions affecting period, meaning that the genetic effects were the same across environments and were the same for males and females, but genotypes differed in their period of circadian rhythm. Given the strong sexual selection in this beetle ([Okada & Miyatake, 2009, 2010](#); [Harano \*et al.\*, 2010](#); [Okada \*et al.\*, 2014](#)), it was surprising that the sexes did not differ in their activity period, especially given that studies of other taxa have found sexual differences in this measure, even if they relate only to development and emergence times (e.g. [Simmons \*et al.\*, 1994](#)).

Many previous studies have investigated the effects of temperature on free-running periods, but few have focused on the power of circadian rhythms. We found that all main effects and their interactions affected power, generating a genotype-by-temperature-by-sex interaction for power, which measured how much activity increased during active periods. For example, the power of male circadian rhythms was much higher at 25 than at 29 °C, whereas females tended to be about the same at either temperature, but this effect differed across genotypes, such that for some genotypes the females were more active at the higher temperature, for example. The sexual element of this interaction affecting the power of the circadian rhythm response probably relates to reproductive behaviours, with males searching for mates and rivals, generating a much greater increase in male activity during the circadian cycle (e.g. [Parker, 1978](#); [Muniz \*et al.\*, 2018](#); [Matsumura \*et al.\*, 2019](#)). This effect seems to be very

**Table 1.** Post-hoc ANOVAs of the MANOVA outcomes testing effects on each activity trait (period and power of rhythm, and total activity) separately

| Trait            | Variable                | d.f. | Sum of square          | Mean square | F       | P-value            |
|------------------|-------------------------|------|------------------------|-------------|---------|--------------------|
| Power of rhythm  | Sex                     | 1    | 13 358                 | 13 838      | 8.9481  | <b>0.0029</b>      |
|                  | Temperature             | 1    | 5794                   | 5794        | 3.8811  | <b>0.0492</b>      |
|                  | Isoline                 | 17   | 283 308                | 16 665      | 11.1636 | <b>&lt; 0.0001</b> |
|                  | Sex*temperature         | 1    | 19 396                 | 19 396      | 12.9927 | <b>0.0003</b>      |
|                  | Sex*isoline             | 17   | 82 189                 | 4835        | 3.2386  | <b>&lt; 0.0001</b> |
|                  | Temperature*isoline     | 17   | 60 760                 | 3574        | 2.3942  | <b>0.0013</b>      |
|                  | Sex*temperature*isoline | 17   | 60 981                 | 3587        | 2.4029  | <b>0.0012</b>      |
|                  | Residuals               | 793  | 1 183 807              | 1493        |         |                    |
| Period of rhythm | Sex                     | 1    | 15                     | 15          | 0.0395  | 0.8425             |
|                  | Temperature             | 1    | 316                    | 316         | 0.8517  | 0.3564             |
|                  | Isoline                 | 17   | 14 474                 | 851         | 2.2961  | <b>0.0021</b>      |
|                  | Sex*temperature         | 1    | 0                      | 0           | 0.0001  | 0.9911             |
|                  | Sex*isoline             | 17   | 4405                   | 259         | 0.6988  | 0.806              |
|                  | Temperature*isoline     | 17   | 9671                   | 569         | 1.5341  | 0.0763             |
|                  | Sex*temperature*isoline | 17   | 4885                   | 287         | 0.775   | 0.7234             |
|                  | Residuals               | 793  | 294 043                | 371         | —       | —                  |
| Total activity   | Sex                     | 1    | 18 867 003             | 18 867 003  | 9.1322  | <b>0.0026</b>      |
|                  | Temperature             | 1    | 54 091 677             | 54 091 677  | 26.182  | <b>&lt; 0.0001</b> |
|                  | Isoline                 | 17   | 4.97 × 10 <sup>8</sup> | 29 211 404  | 14.1392 | <b>&lt; 0.0001</b> |
|                  | Sex*temperature         | 1    | 5 260 553              | 5 260 553   | 2.5463  | 0.1109             |
|                  | Sex*isoline             | 17   | 1.35 × 10 <sup>8</sup> | 7 952 461   | 3.8492  | <b>&lt; 0.0001</b> |
|                  | Temperature*isoline     | 17   | 24 922 413             | 1 466 024   | 0.7096  | 0.7949             |
|                  | Sex*temperature*isoline | 17   | 54 409 111             | 3 200 536   | 1.5492  | 0.0717             |
|                  | Residuals               | 793  | 1.64 × 10 <sup>9</sup> | 2 065 983   | —       | —                  |

Bold means significance statistically.



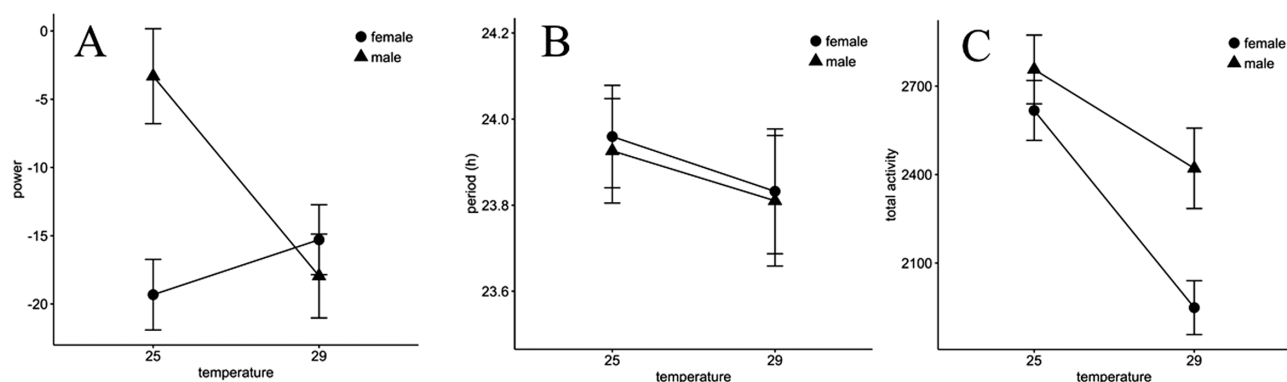

**Figure 1.** Power of activity rhythm (A), period of circadian rhythm (B) and total locomotor activity (C) by sex when measured at 25 and 29 °C, respectively. The error bars represent the SEM.

pronounced in some genotypes, which might relate to genetic variation in male aggression (Harano *et al.*, 2010; Okada & Miyatake, 2010).

It seems plausible that all this explains why circadian activity has greater power in males, but not why male power declines to female levels at 29 °C. Perhaps this decrease is stress related, because stress can shift resources from activity to maintenance, and the effects can be genotype specific (Mitton, 1997). Stress could be important here because beetles are normally reared at 25–27 °C, and because males have large condition-dependent mandibles (House *et al.*, 2016) they might be especially sensitive to stress (David *et al.*, 2000). We need to investigate further the effect of temperature on male–male competition and sexual selection more generally, but in any case, the present study seems to be the first report of a sex difference in the response of the power of circadian rhythm across temperature environments.

The genotype effect indicates genetic variance in the power of the circadian rhythm. Similar findings have been reported in other studies, including recent work investigating output pathways of the circadian clock in *Drosophila* (Cavey *et al.*, 2016; King *et al.*, 2017). That work revealed molecular genetic components that affect the power of the circadian rhythm and perhaps our findings likewise involve output pathways. Furthermore, if the output pathways were affected in our beetles, it would appear that the power, but not the period, of the circadian rhythm was impacted. More work on environmental effects needs to be undertaken to test for genotype–environment interactions, matching calls made in other fields of study (Hunt & Hosken, 2014). Additionally, although the power of the circadian rhythm has been investigated in several previous studies (Malpel *et al.*, 2004; Meshi & Bloch, 2007; Fujioka *et al.*, 2017), there are few studies that have investigated the fitness impacts of a variation

in power. It would seem prudent to conduct such investigations across environments.

We found no significant effect of temperature on the free-running period. This is consistent with previous studies, which have reported temperature compensation in the free-running period of the circadian rhythm in other species (e.g. Pittendrigh, 1954; Zimmerman *et al.*, 1968; Dunlap *et al.*, 2004). We also found no sex differences. This contrasts with *D. melanogaster*, in which males had a shorter period of the circadian rhythm than females (Helfrich-Förster, 2000). This probably relates to male *Drosophila* searching for females (Helfrich-Förster, 2000), whereas in *G. cornutus*, the period of mate searching might be less beneficial because of male–male fighting and strong territoriality (Yamane *et al.*, 2010; Okada *et al.*, 2014). Additionally, males that lose fights do not engage in fighting behaviour for 4 days (Okada & Miyatake, 2010), and losers transfer more sperm to females during copulation (Yamane *et al.*, 2010). Therefore, males might invest more in fighting than in searching for females in *G. cornutus*. However, the males did seem generally to increase power more than females (see above). Rather than increasing the duration of activity, they instead increased how active they were during periods of activity. This suggests that finding females at the right times, when they are receptive, is important. In many insects, the males cannot force copulation after adulthood cuticles have hardened (Markow, 2000; Eberhard, 2002). In any case, the males seemed to increase the amount of activity within a period, rather than increasing the duration of activity, and we found significant genetic variation in the free-running period of the circadian rhythm; this was the only significant main effect. This again implies that period can evolve, which is, arguably, as expected for a behavioural phenotype (Hosken *et al.*, 2019) and all the more so given that there is variation in animal activity periods across taxa (e.g. diurnal vs. nocturnal).

The total locomotor activity over 10 days was affected by the interaction between genotype (isoline) and sex, with males tending to be more active than females at both temperatures, although this effect varied with genotype. Again, this interaction could be understood in terms of stress and the condition dependence of male sexual traits and how both vary across genotypes. There was also an independent (of the interaction) effect of temperature, such that activity was higher at 25 than at 29 °C, which again supports the notion of the higher temperature being more stressful. And again, the genotype (isoline) effect on activity shows there is genetic variation for this trait. We need to undertake additional work to uncover the details of all these effects to gain a greater understanding of some of our findings, especially as they relate to mechanism and fitness.

To conclude, we found strong effects of sex, genotype and environment (temperature) on a range of measures of circadian activity. These effects interacted and did not act consistently on all the activity elements we measured. Thus, it appears that activity is like many other behaviours, being affected by genes and environment and their interaction, and elements of activity seem to be somewhat independent of each other. However, additional work is needed both to clarify the detail of our findings and to test their generality across taxa.

## ACKNOWLEDGEMENTS

This work was supported by the Japan Society for the Promotion of Science Grant-in-Aid for Scientific Research, KAKENHI 16K14810, Ministry of Education, Culture, Sports, Science and Technology, to T.M. We thank the reviewers for their helpful comments. All procedures performed in studies involving animals were in accordance with the ethical standards of Okayama University and the University of Exeter, where the studies were conducted. We followed all of the Committee on Publication Ethics guidelines. The authors declare that they have no conflict of interest.

## REFERENCES

- Anderson M. 1994.** *Sexual selection*. Princeton: Princeton University Press.
- Aschoff J. 1960.** Exogenous and endogenous components in circadian rhythms. *Cold Spring Harbor Symposia on Quantitative Biology* **25**: 11–28.
- Aschoff J. 1965.** Circadian rhythms in man. *Science* **148**: 1427–1432.
- Cavey M, Collins B, Bertet C, Blau J. 2016.** Circadian rhythms in neuronal activity propagate through output circuits. *Nature Neuroscience* **19**: 587–595.
- David JR, Gibert P, Legout H, Pétavy G, Capy P, Moreteau B. 2005.** Isofemale lines in *Drosophila*: an empirical approach to quantitative trait analysis in natural populations. *Heredity* **94**: 3–12.
- David P, Bjorksten T, Fowler K, Pomiankowski A. 2000.** Condition-dependent signalling of genetic variation in stalk-eyed flies. *Nature* **406**: 186–188.
- Dunlap JC. 1996.** Genetics and molecular analysis of circadian rhythms. *Annual Review of Genetics* **30**: 579–601.
- Dunlap JC, Loros JJ, DeCoursey PJ. 2004.** *Chronobiology: biological timekeeping*. Oxford: Sinauer Associates.
- Eberhard WG. 2002.** The function of female resistance behavior: intromission by male coercion vs. female cooperation in sepsis flies (Diptera: Sepsidae). *Revista de Biología Tropical* **50**: 485–505.
- Emlen DJ. 2015.** *Animal weapons: the evolution of battle*. London: Picador.
- Fujioka H, Abe MS, Fuchikawa T, Tsuji K, Shimada M, Okada Y. 2017.** Ant circadian activity associated with brood care type. *Biology Letters* **13**: 20160743.
- Halberg F. 1969.** Chronobiology. *Annual Review of Physiology* **31**: 675–725.
- Harano T, Miyatake T. 2011.** Independence of genetic variation between circadian rhythm and development time in the seed beetle, *Callosobruchus chinensis*. *Journal of Insect Physiology* **57**: 415–420.
- Harano T, Okada K, Nakayama S, Miyatake T, Hosken DJ. 2010.** Intralocus sexual conflict unresolved by sex-limited trait expression. *Current Biology* **20**: 2036–2039.
- Helfrich-Förster C. 2000.** Differential control of morning and evening components in the activity rhythm of *Drosophila melanogaster*—sex-specific differences suggest a different quality of activity. *Journal of Biological Rhythms* **15**: 135–154.
- Hosken DJ, Hunt J, Wedell N. 2019.** *Genes and behaviour: beyond nature-nurture*. Chichester: Wiley.
- House CM, Jensen K, Rapkin J, Lane S, Okada K, Hosken DJ, Hunt J. 2016.** Macronutrient balance mediates the growth of sexually selected weapons but not genitalia in male broad-horned beetles. *Functional Ecology* **30**: 769–779.
- Hunt J, Hosken DJ. 2014.** *Genotype-by-environment interactions in sexual selection*. Oxford: Wiley Blackwell.
- King AN, Barber AF, Smith AE, Dreyer AP, Sitaraman D, Nitabach MN, Cavanaugh DJ, Sehgal A. 2017.** A peptidergic circuit links the circadian clock to locomotor activity. *Current Biology* **27**: 1915–1927.e5.
- Klarsfeld A, Leloup JC, Rouyer F. 2003.** Circadian rhythms of locomotor activity in *Drosophila*. *Behavioural Processes* **64**: 161–175.
- Malpel S, Klarsfeld A, Rouyer F. 2004.** Circadian synchronization and rhythmicity in larval photoperception-defective mutants of *Drosophila*. *Journal of Biological Rhythms* **19**: 10–21.
- Markow TA. 2000.** Forced matings in natural populations of *Drosophila*. *The American Naturalist* **156**: 100–103.
- Matsumura K, Archer CR, Hosken DJ, Miyataka T. 2019.** Artificial selection on walking distance suggests

- a mobility-sperm competitiveness trade-off. *Behavioral Ecology* **30**: 1522–1529.
- Meshi A, Bloch G. 2007.** Monitoring circadian rhythms of individual honey bees in a social environment reveals social influences on postembryonic ontogeny of activity rhythms. *Journal of Biological Rhythms* **22**: 343–355.
- Mitton JB. 1997.** *Selection in natural populations*. Oxford: Oxford University Press.
- Muniz DG, Baena ML, Macías-Ordóñez R, Machado G. 2018.** Males, but not females, perform strategic mate searching movements between host plants in a leaf beetle with scramble competition polygyny. *Ecology and Evolution* **8**: 5828–5836.
- Okada K, Katsuki M, Sharma MD, House CM, Hosken DJ. 2014.** Sexual conflict over mating in *Gnatocerus cornutus*? Females prefer lovers not fighters. *Proceedings of the Royal Society B: Biological Sciences* **281**: 20140281.
- Okada K, Miyanoshita A, Miyatake T. 2006.** Intra-sexual dimorphism in male mandibles and male aggressive behavior in the broad-horned flour beetle *Gnatocerus cornutus* (Coleoptera: Tenebrionidae). *Journal of Insect Behavior* **19**: 457–467.
- Okada K, Miyatake T. 2009.** Genetic correlations between weapons, body shape and fighting behaviour in the horned beetle *Gnatocerus cornutus*. *Animal Behaviour* **77**: 1057–1065.
- Okada K, Miyatake T. 2010.** Effect of losing on male fights of broad horned flour beetle, *Gnatocerus cornutus*. *Behavioral Ecology and Sociobiology* **64**: 361–359.
- Parker GA. 1978.** The evolution of competitive mate searching. *Annual Review of Entomology* **23**: 173–196.
- Pittendrigh CS. 1954.** On temperature independence in the clock system controlling emergence time in *Drosophila*. *Proceedings of the National Academy of Sciences of the United States of America* **40**: 1018–1029.
- R Development Core Team. 2017.** *R: a language and environment for statistical computing*. R version 3.4.3. Vienna: R Foundation for Statistical Computing.
- Rashed A, Polak M. 2010.** Differential condition dependence among morphological traits inferred from responses to heat stress is predicted by sexual selection theory. *Biological Journal of the Linnean Society* **101**: 566–574.
- Saunders DS. 2002.** *Insect clocks*, 3rd edn. Amsterdam: Elsevier.
- Simmons LW, Llorens T, Schinzig M, Hosken D, Craig M. 1994.** Sperm competition selects for male mate choice and protandry in the bushcricket, *Requena verticalis* (Orthoptera: Tettigoniidae). *Animal Behaviour* **47**: 117–122.
- Sokolove PG, Bushell WN. 1978.** The chi square periodogram: its utility for analysis of circadian rhythms. *Journal of Theoretical Biology* **72**: 131–160.
- Sorek M, Levy O. 2012.** The effect of temperature compensation on the circadian rhythmicity of photosynthesis in *Symbiodinium*, coral-symbiotic alga. *Scientific Reports* **2**: 536.
- Yamane T, Okada K, Nakayama S, Miyatake T. 2010.** Dispersal and ejaculatory strategies associated with exaggeration of weapon in an armed beetle. *Proceedings of the Royal Society B: Biological Sciences* **277**: 1705–1710.
- Zimmerman WF, Pittendrigh CS, Pavlidis T. 1968.** Temperature compensation of the circadian oscillation in *Drosophila pseudoobscura* and its entrainment by temperature cycles. *Journal of Insect Physiology* **14**: 669–684.

## SUPPORTING INFORMATION

Additional Supporting Information may be found in the online version of this article at the publisher's web-site:

**Figure S1.** A, the three-way interaction between temperature, sex and genotype (isoline) affecting activity rhythm power. This shows that the effects of temperature depend on sex and on genotype; for example, for some genotypes the males are more active at 29 °C and for others the females are (Supporting Information, Fig. S2 shows the sex-by-temperature element of this interaction). B, the period of activity for different genotypes (isolines). Genotype was the only variable that explained significant variation in activity period. C, the interaction between sex and genotype (isoline) affecting total activity. On average, males tend to be more active but this varies across genotypes; in isolate 10, for example, females are more active. In the all graphs, the error bars represent the SEM.

**Figure S2.** The three-way interaction between temperature, sex and genotype (isoline) affecting total activity. This shows that the effects of temperature depend on sex and on genotype. The error bars represent SEM.

**Figure S3.** Examples of activity rhythm traces of males and females at two temperatures, 25 and 29 °C.

**Table S1.** Sample sizes for each isolate of *Gnatocerus cornutus*.

**Table S2.** MANOVA with period and power of circadian rhythm, and total activity.
